# Supplementary material for: Assessment of tumor biomarkers for prognosis in interstitial lung disease associated with connective tissue disease: a prospective study
Source: PubMed Central journal article supplement — J Thorac Dis. 2024 Nov 21;16(11):7383–96. doi: 10.21037/jtd-24-922 (PMC11635275; doi:10.21037/jtd-24-922), 2024-11-21
Supplement: jtd-16-11-7383-dss.pdf [file jtd-16-11-7383-dss.pdf]

## Data Sharing Statement

|                     |                                                                                                                                                     |                                                                                                                         |
|---------------------|-----------------------------------------------------------------------------------------------------------------------------------------------------|-------------------------------------------------------------------------------------------------------------------------|
| <b>Article Info</b> | https://dx.doi.org/10.21037/jtd-24-922                                                                                                              |                                                                                                                         |
| <b>Item</b>         | <b>Question</b>                                                                                                                                     | <b>Authors' Response<br/>(place "-" if not applicable)</b>                                                              |
| 1                   | Would you like to share data collected for your study to others?                                                                                    | Yes.                                                                                                                    |
| 2                   | If not, would you like to share the reason for your decision?                                                                                       |                                                                                                                         |
| 3                   | What data in particular will be shared?                                                                                                             | The data on patients' clinical characteristics and disease course in particular will be shared.                         |
| 4                   | Any other documents will be shared? Such as study protocol, statistical analysis plan, informed consent form, clinical study report, analytic code. | Study protocol, statistical analysis plan, informed consent form will also be shared if requested.                      |
| 5                   | When will data availability begin?                                                                                                                  | From the publication date.                                                                                              |
| 6                   | When will data availability end?                                                                                                                    | Two years within the publication date.                                                                                  |
| 7                   | To whom will you share the data?                                                                                                                    | Respiratory physicians and rheumatologists interested in the study of pulmonary fibrosis and connective tissue disease. |
| 8                   | For what type of analysis or purpose?                                                                                                               | For analysis to evaluate the role of tumor markers in pulmonary fibrosis.                                               |
| 9                   | How or where can the data/documents be obtained?                                                                                                    | Emails could be sent to the address below to obtain the shared data:<br>yeqiao_chaoyang@sina.com                        |
| 10                  | Any other restrictions?                                                                                                                             | We may balance the potential benefits and risks for each request and then provide the data that could be shared.        |
